# Supplementary material for: Polyphosphate kinases modulate Campylobacter jejuni outer membrane constituents and alter its capacity to invade and survive in intestinal epithelial cells in vitro
Source: PubMed Central journal article supplement (PMC4715166; doi:10.1038/emi.2015.77), 2015-12-30
Supplement: emi201577x1.pdf [file emi201577x1.pdf]

# Supplemental Figure 1

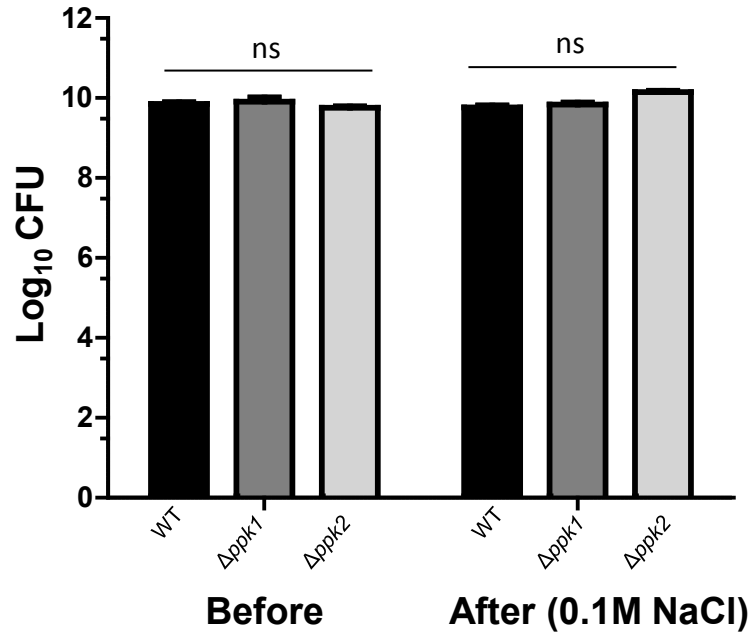

**Supplemental Figure S1** Effect of 0.1 M NaCl on the viability of WT,  $\Delta ppk1$  and  $\Delta ppk2$  *C. jejuni* strains. Overnight grown cultures were harvested in MH broth and washed once by centrifuging at 10 000 *g* for 5 min. The cultures were suspended in MH broth to adjust the  $\text{OD}_{600\text{nm}}$  to 1.0 in a 14 mL culture tube. Before treatment, 100  $\mu\text{L}$  of the adjusted OD cultures was used to determine the CFU by a 10-fold serial dilution. Culture tubes were incubated at 4° C in microaerophilic conditions for 48 h. After incubation, CFUs were determined by plate counting. Results are presented as the mean $\pm$ SEM of two independent experiments with duplicate samples in each experiment. 'ns' indicates non-significant (One way ANOVA).
