# Supplementary material for: Polyphosphate kinases modulate Campylobacter jejuni outer membrane constituents and alter its capacity to invade and survive in intestinal epithelial cells in vitro
Source: PubMed Central journal article supplement (PMC4715166; doi:10.1038/emi.2015.77), 2015-12-30
Supplement: emi201577x2.pdf [file emi201577x2.pdf]

## Supplemental Figure 2

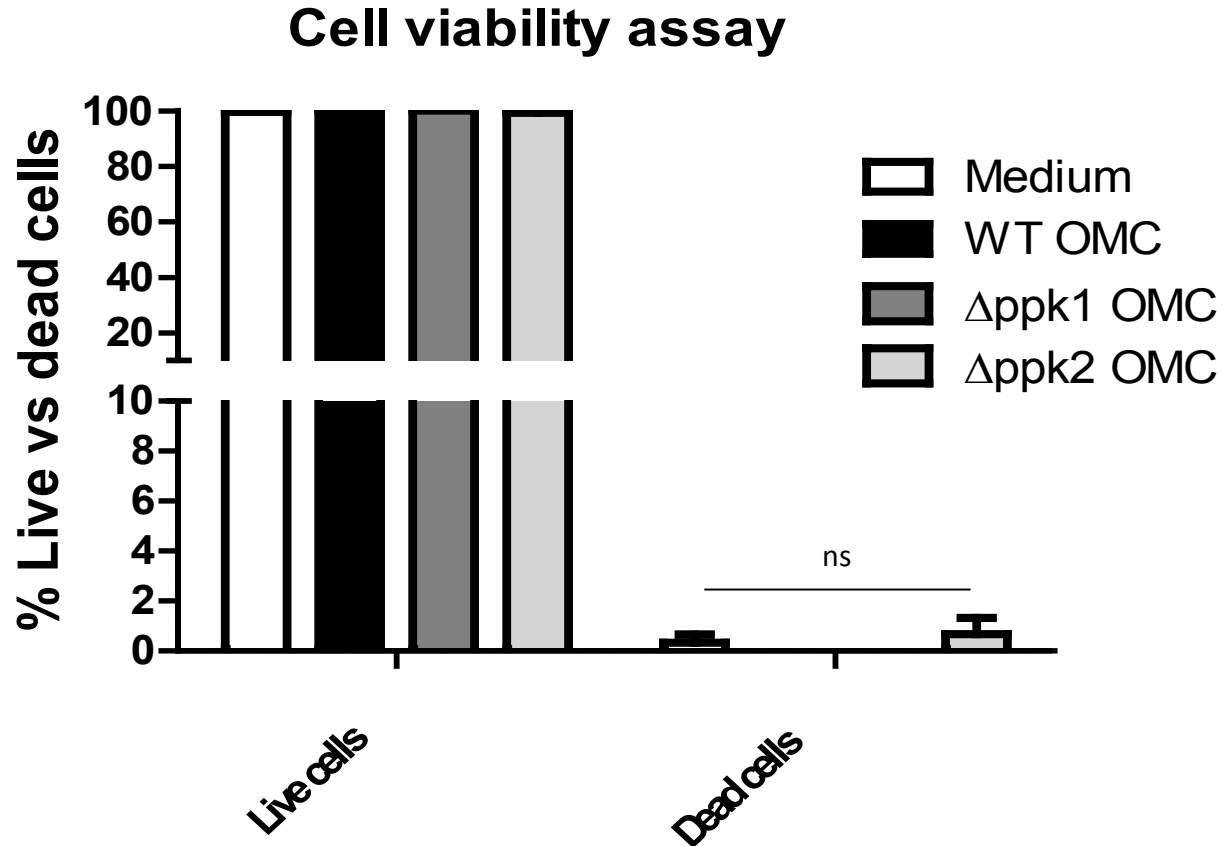

**Supplemental Figure S2** Determining the effect of the total OMC from WT,  $\Delta ppk1$  and  $\Delta ppk2$  on INT-407 cell viability. INT-407 cell monolayers were incubated with the OMC from *C. jejuni* wild type and mutants (150  $\mu\text{g}/\text{mL}$ ) for 1 h in triplicate wells, and the viability of the cells was determined using trypan blue staining. Results are presented as the mean  $\pm$  SEM of the number of live and dead cells, where 'ns' indicates not significant (one way ANOVA).
