# Supplementary material for: Polyphosphate kinases modulate Campylobacter jejuni outer membrane constituents and alter its capacity to invade and survive in intestinal epithelial cells in vitro
Source: PubMed Central journal article supplement (PMC4715166; doi:10.1038/emi.2015.77), 2015-12-30
Supplement: emi201577x3.pdf [file emi201577x3.pdf]

# Supplemental Figure 3

## A

### Invasion

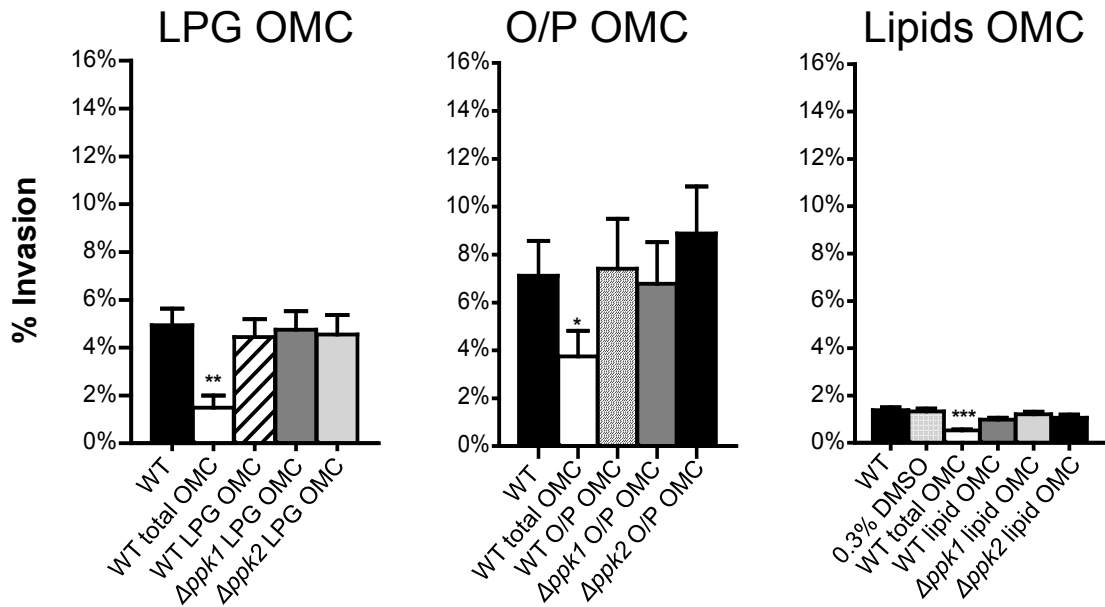

## B

### Survival

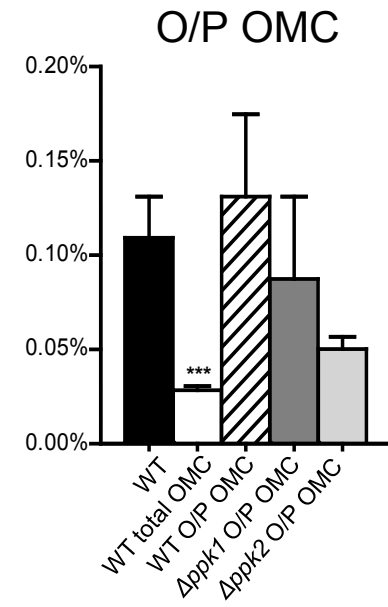

**Supplemental Figure S3 (A)** Effect of LPG OMC, O/P OMC, and Lipid OMC from WT,  $\Delta ppk1$  and  $\Delta ppk2$  on *C. jejuni* invasion of **(A)** and survival in **(B)** INT-407 cells. The total OMC was also tested with each fraction as a control using the same concentration that was used for each fraction. A 0.3% DMSO vehicle used to resuspend lipid fraction was also tested as a control. Results are presented as the mean $\pm$ SEM of the number of bacteria recovered after cell lysis. Each value is the mean of at least two separate experiments performed in triplicate on different days. Asterisks (\*) indicate the significant difference compared to the unexposed infected INT-407 cells (one-way ANOVA, \*\*\* $P$ <0.001, \*\* $P$ <0.01).
